# Supplementary material for: Demanding New Honey Qualitative Standard Based on Antibacterial Activity
Source: MDPI journal article supplement (doi:10.3390/foods9091263), 2020-09-09
Supplement: s1 [file s1]

## Supporting information

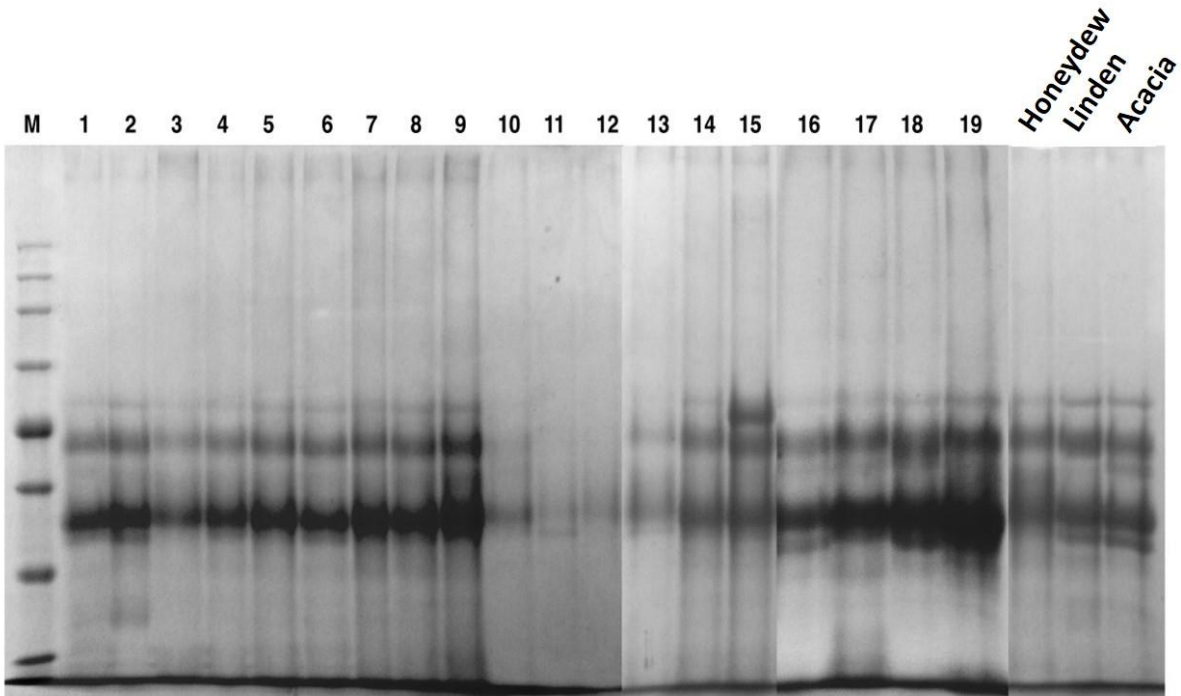

**Figure S1.** Protein profile of commercial honey samples (n=19) from supermarkets and three samples from local beekeepers. A 15  $\mu$ L of diluted honey samples (50% w/w in distilled water) were separated by 12% SDS-PAGE gels and protein content assessed after gel staining with Coomassie Brilliant Blue R-250

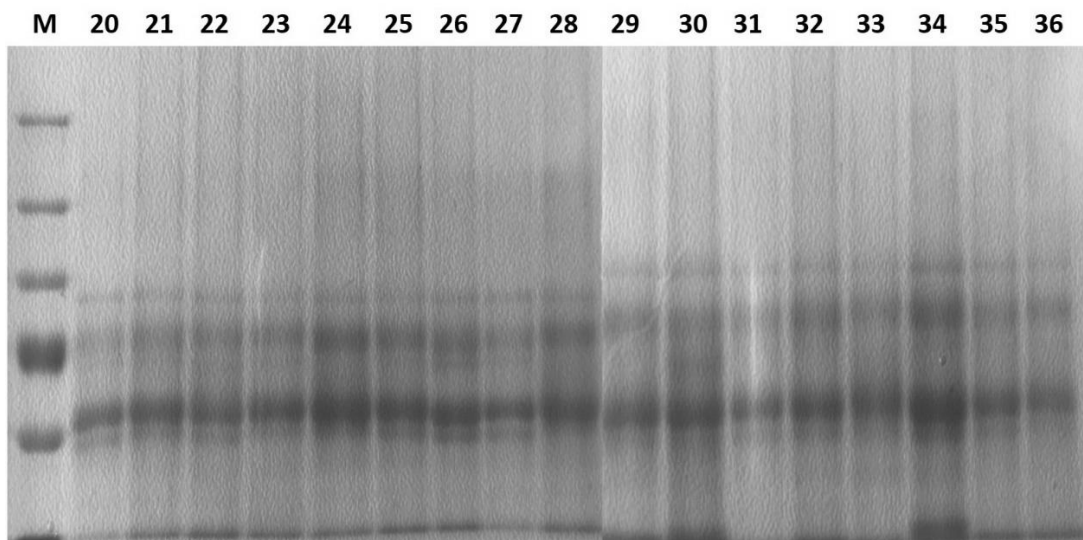

**Figure S2.** Protein profile of commercial honey samples (n=17) from local food shops. A 15  $\mu$ L of diluted honey samples (50% w/w in distilled water) were separated by 12% SDS-PAGE gels and protein content assessed after gel staining with Serva blue.
